# Supplementary material
Source: publisher site journal article supplement (https://static.cambridge.org/content/id/urn:cambridge.org:id:article:S0956796822000107/resource/name/S0956796822000107supp001.v)
Supplement: Supplementary file 1 [file S0956796822000107supp001.v]

(* coq_in_no_hurry.v *)
(* this file accompanies
     Fold-Unfold Lemmas
     for Equational Reasoning about Recursive Programs
     in the Coq Proof Assistant
   by Olivier Danvy <danvy@acm.org> *)
(* Singapore, 2022 *)

(* ********** *)

(* {ARITH} *)
Require Import Arith.
(* {END} *)

(* {ADD_0_L} *)
Check Nat.add_0_l. (* : forall m : nat, 0 + m = m *)
(* {END} *)

(* {ADD_SUCC_L} *)
Check Nat.add_succ_l. (* forall n m : nat, S n + m = S (n + m) *)
(* {END} *)

(* {ADD_ASSOC} *)
Check Nat.add_assoc. (* : forall n m p : nat, n + (m + p) = n + m + p *)
(* {END} *)

(* {MUL_0_L} *)
Check Nat.mul_0_l. (* : forall m : nat, 0 * m = 0 *)
(* {END} *)

(* {MUL_SUCC_L} *)
Check Nat.mul_succ_l. (* : forall n m : nat, S n * m = n * m + m *)
(* {END} *)

(* {MUL_ADD_DISTR_R} *)
Check Nat.mul_add_distr_r. (* : forall n m p : nat, (n + m) * p = n * p + m * p *)
(* {END} *)

(* {MUL_ADD_DISTR_L} *)
Check Nat.mul_add_distr_l. (* : forall n m p : nat, n * (m + p) = n * m + n * p *)
(* {END} *)

(* ***** *)

(* {MUL_ADD_DISTR_L_2} *)
Check (Nat.mul_add_distr_l 2). (* : forall m p : nat, 2 * (m + p) = 2 * m + 2 * p *)
(* {END} *)

(* {MUL_ADD_DISTR_L_2_3} *)
Check (Nat.mul_add_distr_l 2 3). (* : forall p : nat, 2 * (3 + p) = 2 * 3 + 2 * p *)
(* {END} *)

(* {MUL_ADD_DISTR_L_2_3_4} *)
Check (Nat.mul_add_distr_l 2 3 4). (* : 2 * (3 + 4) = 2 * 3 + 2 * 4 *)
(* {END} *)

(* {ADD_SUCC_L_3} *)
Check (Nat.add_succ_l 3). (* : forall m : nat, 4 + m = S (3 + m) *)
(* {END} *)

(* ***** *)

(* fold-unfold lemmas associated to the inductive definition of addition: *)

(* {FOLD_UNFOLD_ADD_O} *)
Definition fold_unfold_add_O : forall m : nat, 0 + m = m :=
  Nat.add_0_l.
(* {END} *)

(* {FOLD_UNFOLD_ADD_S} *)
Definition fold_unfold_add_S : forall n m : nat, S n + m = S (n + m) :=
  Nat.add_succ_l.
(* {END} *)

(* ***** *)

(* fold-unfold lemmas associated to the inductive definition of multiplication: *)

(* {FOLD_UNFOLD_MUL_O} *)
Definition fold_unfold_mul_O : forall m : nat, 0 * m = 0 :=
  Nat.mul_0_l.
(* {END} *)

(* {FOLD_UNFOLD_MUL_S} *)
Definition fold_unfold_mul_S : forall n m : nat, S n * m = n * m + m :=
  Nat.mul_succ_l.
(* {END} *)

(* ***** *)

(* {MUL_1_L} *)
Lemma mul_1_l :
  forall n : nat,
    1 * n = n.
Proof.
  intro n.
  (* goal: 1 * n = n *)
  rewrite -> (fold_unfold_mul_S 0 n).
  (* goal: 0 * n + n = n *)
  rewrite -> (fold_unfold_mul_O n).
  (* goal: 0 + n = n *)
  rewrite -> (fold_unfold_add_O n).
  (* goal: n = n *)
  reflexivity.
Qed.
(* {END} *)

(* {TWICE} *)
Lemma twice :
  forall n : nat,
    n + n = 2 * n.
Proof.
  intro n.
  (* goal: n + n = 2 * n *)
  rewrite -> (fold_unfold_mul_S 1 n).
  (* goal: n + n = 1 * n + n *)
  rewrite -> (mul_1_l n).
  (* goal: n + n = n + n *)
  reflexivity.
Qed.
(* {END} *)

(* {TWICE_S} *)
Lemma twice_S :
  forall n : nat,
    S (S (2 * n)) = 2 * S n.
(* {END} *)
(* {PROOF_OF_TWICE_S} *)
Proof.
  intro n.
  (* goal: S (S (2 * n)) = 2 * S n *)
  rewrite <- (twice n).
  (* goal: S (S (n + n)) = 2 * S n *)
  rewrite -> (plus_n_Sm n n).
  (* goal: S (n + S n) = 2 * S n *)
  rewrite <- (plus_Sn_m n (S n)).
  (* goal: S n + S n = 2 * S n *)
  exact (twice (S n)).
Qed.  
(* {END} *)

(* ***** *)

(* {SQUARE} *)
Definition square (n : nat) : nat :=
  n * n.
(* {END} *)

(* {BINOMIAL_EXPANSION_AT_RANK_2} *)
Lemma binomial_expansion_at_rank_2 :
  forall x y : nat,
    square (x + y) = square x + 2 * (x * y) + square y.
Proof.
  intros x y.
  (* goal: square (x + y) = square x + 2 * (x * y) + square y *)
  unfold square at 1.
  (* goal: (x + y) * (x + y) = square x + 2 * (x * y) + square y *)
  rewrite -> (Nat.mul_add_distr_r x y (x + y)).
  (* goal: x * (x + y) + y * (x + y) = square x + 2 * (x * y) + square y *)
  rewrite -> (Nat.mul_add_distr_l x x y).
  (* goal: x * x + x * y + y * (x + y) = square x + 2 * (x * y) + square y *)
  rewrite -> (Nat.mul_add_distr_l y x y).
  (* goal: x * x + x * y + (y * x + y * y) = square x + 2 * (x * y) + square y *)
  rewrite -> (Nat.add_assoc (x * x + x * y) (y * x) (y * y)).
  (* goal: x * x + x * y + y * x + y * y = square x + 2 * (x * y) + square y *)
  rewrite <- (Nat.add_assoc (x * x) (x * y) (y * x)).
  (* goal: x * x + (x * y + y * x) + y * y = square x + 2 * (x * y) + square y *)
  rewrite -> (Nat.mul_comm y x).
  (* goal: x * x + (x * y + x * y) + y * y = square x + 2 * (x * y) + square y *)
  rewrite -> (twice (x * y)).
  (* goal: x * x + 2 * (x * y) + y * y = square x + 2 * (x * y) + square y *)
  fold (square x).
  (* goal: square x + 2 * (x * y) + y * y = square x + 2 * (x * y) + square y *)
  fold (square y).
  (* goal: square x + 2 * (x * y) + square y = square x + 2 * (x * y) + square y *)
  reflexivity.
Qed.
(* {END} *)

(* the proof above was from left to right *)
(* the proof below is from right to left *)

Lemma binomial_expansion_at_rank_2_alt :
  forall x y : nat,
    square (x + y) = square x + 2 * (x * y) + square y.
Proof.
  intros x y.
  (* goal: square (x + y) = square x + 2 * (x * y) + square y *)
  unfold square at 3.
  (* goal: square (x + y) = square x + 2 * (x * y) + y * y *)
  unfold square at 2.
  (* goal: square (x + y) = x * x + 2 * (x * y) + y * y *)
  rewrite <- (twice (x * y)).
  (* goal: square (x + y) = x * x + (x * y + x * y) + y * y *)
  rewrite -> (Nat.add_assoc (x * x) (x * y) (x * y)).
  (* goal: square (x + y) = x * x + x * y + x * y + y * y *)
  rewrite <- (Nat.mul_add_distr_l x x y).
  (* goal: square (x + y) = x * (x + y) + x * y + y * y *)
  rewrite <- (Nat.add_assoc (x * (x + y)) (x * y) (y * y)).
  (* goal: square (x + y) = x * (x + y) + (x * y + y * y) *)
  rewrite <- (Nat.mul_add_distr_r x y y).
  (* goal: square (x + y) = x * (x + y) + (x + y) * y *)
  rewrite -> (Nat.mul_comm (x + y) y).
  (* goal: square (x + y) = x * (x + y) + y * (x + y) *)
  rewrite <- (Nat.mul_add_distr_r x y (x + y)).
  (* goal: square (x + y) = (x + y) * (x + y) *)
  fold (square (x + y)).
  (* goal: square (x + y) = square (x + y) *)
  reflexivity.
Qed.

(* ***** *)

(* {ADD_COMM} *)
Lemma add_comm :
  forall i j : nat,
    i + j = j + i.
Proof.
  intro i.
  (* goal: forall j : nat, i + j = j + i *)
  induction i as [ | i' IHi']. (* outer induction *)
  { (* goal: forall j : nat, 0 + j = j + 0 *)
    intro j.
    (* goal: 0 + j = j + 0 *)
    rewrite -> (fold_unfold_add_O j).
    (* goal: j = j + 0 *)
    induction j as [ | j' IHj']. (* inner induction in the outer base case *)
    { (* goal: 0 = 0 + 0 *)
      rewrite -> (fold_unfold_add_O 0).
      (* goal: 0 = 0 *)
      reflexivity. }
    { (* IHj' : j' = j' + 0 *)
      (* goal: S j' = S j' + 0 *)
      rewrite -> (fold_unfold_add_S j' 0).
      (* goal: S j' = S (j' + 0) *)
      rewrite <- IHj'.
      (* goal: S j' = S j' *)
      reflexivity. } }
  { (* IHi' : forall j : nat, i' + j = j + i' *)
    (* goal: forall j : nat, S i' + j = j + S i' *)
    intro j.
    (* goal: S i' + j = j + S i' *)
    rewrite -> (fold_unfold_add_S i' j).
    (* goal: S (i' + j) = j + S i' *)
    induction j as [ | j' IHj']. (* inner induction in the outer induction step *)
    { (* goal: S (i' + 0) = 0 + S i' *)
      rewrite -> (IHi' 0).
      (* goal: S (0 + i') = 0 + S i' *)
      rewrite -> (fold_unfold_add_O i').
      (* goal: S i' = 0 + S i' *)
      rewrite -> (fold_unfold_add_O (S i')).
      (* goal: S i' = S i' *)
      reflexivity. }
    { (* IHj' : S (i' + j') = j' + S i' *)
      (* goal: S (i' + S j') = S j' + S i' *)
      rewrite -> (IHi' (S j')).
      (* goal: S (S j' + i') = S j' + S i' *)
      rewrite -> (fold_unfold_add_S j' i').
      (* goal: S (S (j' + i')) = S j' + S i' *)
      rewrite -> (fold_unfold_add_S j' (S i')).
      (* goal: S (S (j' + i')) = S (j' + S i') *)
      rewrite <- IHj'.
      (* goal: S (S (j' + i')) = S (S (i' + j')) *)
      rewrite -> (IHi' j').
      (* goal: S (S (j' + i')) = S (S (j' + i')) *)
      reflexivity. } }
Qed.
(* {END} *)

(* ********** *)

(* end of coq_in_no_hurry.v *)
